# Supplementary material for: Effects of urban airborne particulate matter exposure on the human upper respiratory tract microbiome: a systematic review
Source: Springer Nature journal article supplement (doi:10.1186/s12931-025-03179-9), 2025-03-28
Supplement: MOESM3 [file 12931_2025_3179_MOESM3_ESM.pdf]

**Additional file 3:** Statistically significant variations on alpha-diversity after exposure to high PM levels reported by the reviewed studies.

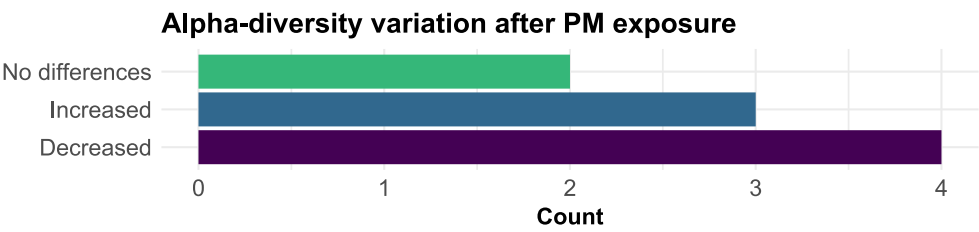

**Note:** The study of Mariani et al (2021) is depicted twice, since they reported a significant increase in alpha-diversity in individuals with allergic rhinitis, but a significant decrease in healthy subjects.
